# Supplementary material for: In Vitro Inhibitory Potential of Different Anthocyanin-Rich Berry Extracts in Murine CT26 Colon Cancer Cells
Source: MDPI journal article supplement (doi:10.3390/molecules28237684), 2023-11-21
Supplement: s1 [file s1]

# Supplementary information for

## **In vitro inhibitory potential of different anthocyanin-rich berry extracts in murine CT26 colon cancer cells**

**Cornelia Schmutz <sup>1,2</sup>, Frank Will <sup>3</sup>, Elisabeth Varga <sup>1,#</sup>, Carola Jaunecker <sup>4</sup>, Gudrun Pahlke <sup>1</sup>, Walter Berger <sup>4</sup> and Doris Marko <sup>1,\*</sup>**

<sup>1</sup> Department of Food Chemistry and Toxicology, Faculty of Chemistry, University of Vienna; Währingerstraße 38-40, 1090 Vienna, Austria; cornelia.schmutz@univie.ac.at (CS), gudrun.pahlke@univie.ac.at (GP)

<sup>2</sup> Doctoral School in Chemistry; University of Vienna; Währingerstraße 42, 1090 Vienna, Austria

<sup>3</sup> Department of Beverage Research, Hochschule Geisenheim University; P.O. Box 1154, 65366 Geisenheim, Germany; Frank.Will@hs-gm.de (FW)

<sup>4</sup> Center for Cancer Research and Comprehensive Cancer Center, Medical University of Vienna; Borschkegasse 8a, 1090 Vienna, Austria; carola.jaunecker@meduniwien.ac.at (CJ), walter.berger@meduniwien.ac.at (WB)

<sup>#</sup> Current address: Unit of Hygiene and Technology of Food; Institute of Food Safety, Food Technology and Veterinary Public Health; University of Veterinary Medicine Vienna; Veterinärplatz 1, 1210 Vienna, Austria; elisabeth.varga@vetmeduni.ac.at (EV)

<sup>\*</sup> Correspondence: doris.marko@univie.ac.at (DM)

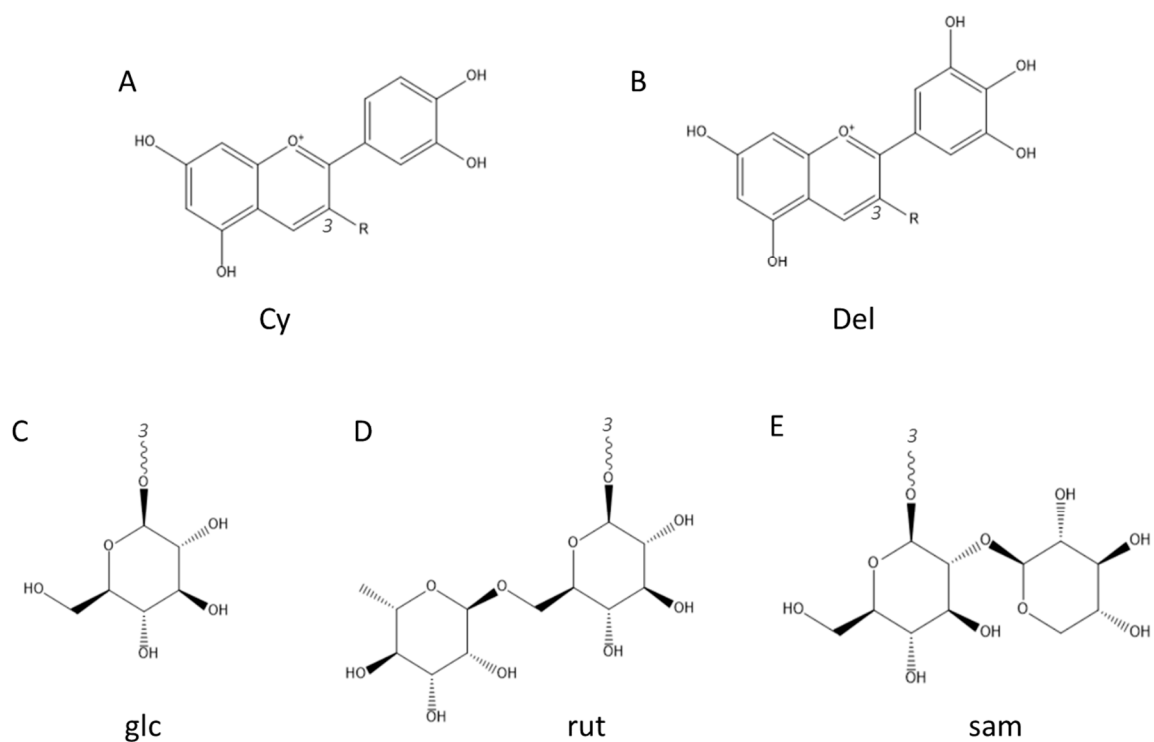

Figure S1: Chemical structures of anthocyanidins (A) cyanidin (R=OH, Cy), (B) delphinidin (R=OH, Del) and the sugars bound to position 3 of the anthocyanidins (C) glucoside (glc), (D) rutinoside (rut) and (E) sambubioside (sam).

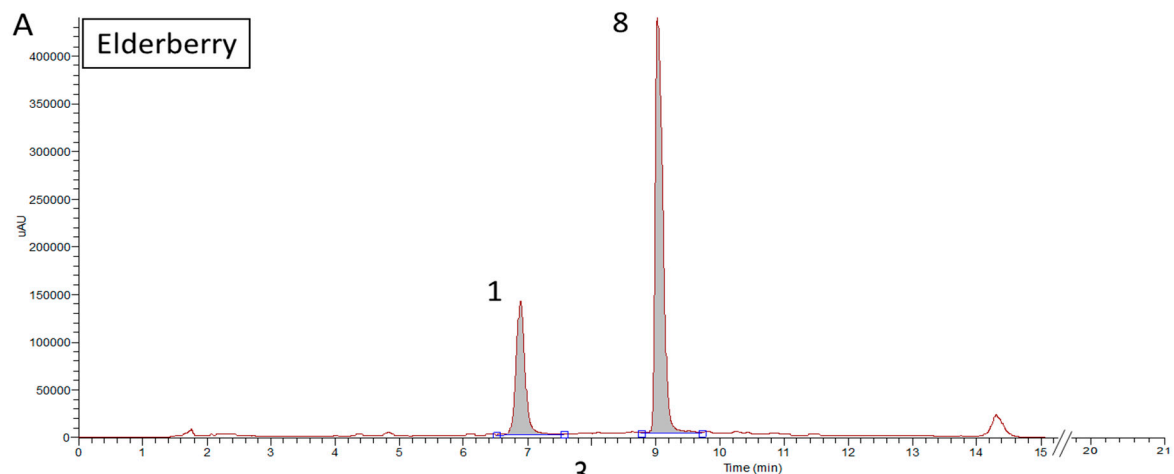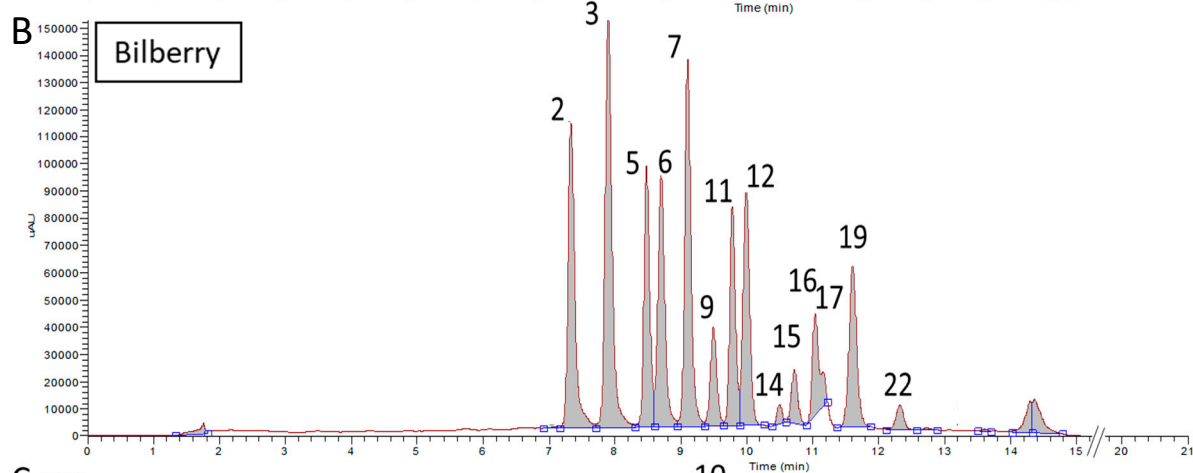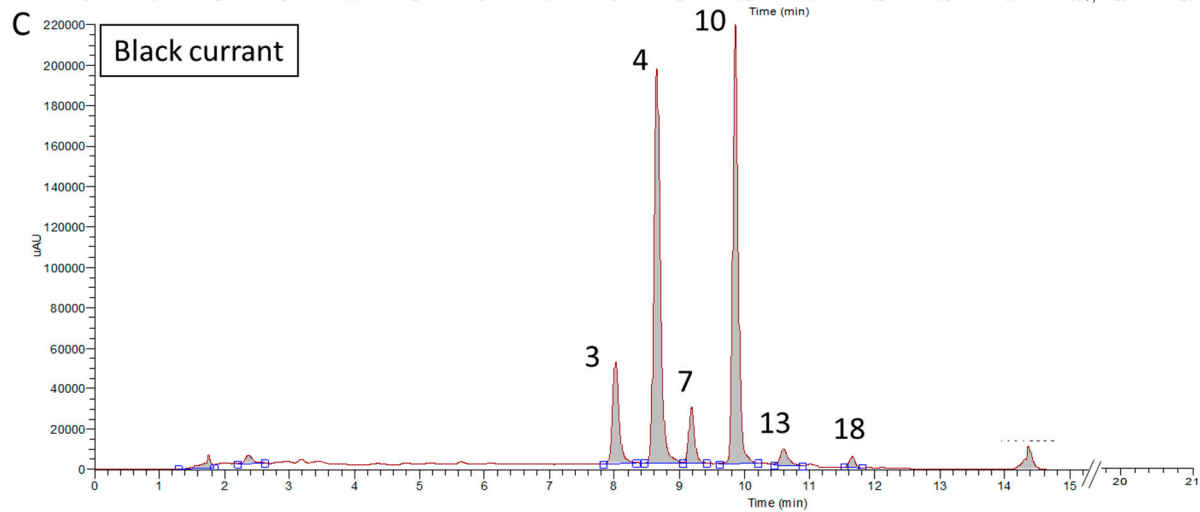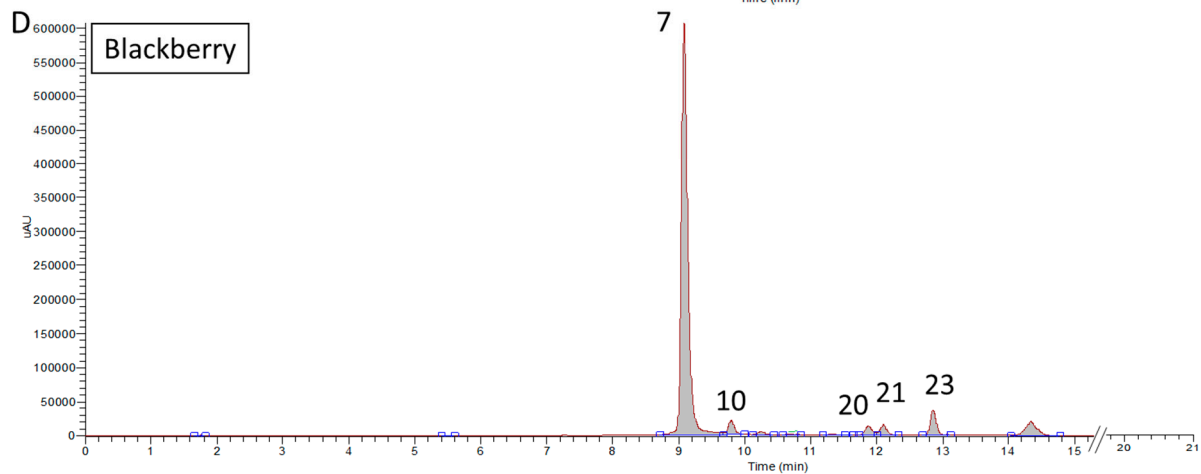

Figure S2: Chromatograms of (A) elderberry (EB), (B) bilberry (Bil), (C) black currant (BC) and (D) blackberry (BB). Peak annotation is described in Table S1 below. Chromatographic separation was performed using a 3  $\mu$ m LUNA C18 column (150x2 mm) with an injection volume of 4  $\mu$ l. Solvent A and B were 5 % formic acid and methanol, respectively. After 1 min isocratic condition with 10 % B, a linear gradient from 10-40 % B for 12 min followed. Ultimately, washing with 100 % B was performed for 7 min. Peaks were assigned according to their mass spectra and retention times.

Table S1: Peak annotation of the chromatograms shown in Figure S2. Retention times (RT) and mass to charge ( $m/z$ ) values of parent compounds and specific fragments used for analysis and assignation of single anthocyanins contained in blackberry (BB), bilberry (Bil), black currant (BC) and elderberry (EB) extracts.

| Peak number | Compound                                                  | Contained in | RT [min] | Specific fragments $m/z$ |     |     |     |
|-------------|-----------------------------------------------------------|--------------|----------|--------------------------|-----|-----|-----|
| 1           | cyanidin-3- <i>O</i> -sambubioside-5- <i>O</i> -glucoside | EB           | 6.90     | 743                      | 581 | 449 | 287 |
| 2           | delphinidin-3- <i>O</i> -galactoside                      | Bil          | 7.34     | 465                      | 303 | -   | -   |
| 3           | delphinidin-3- <i>O</i> -glucoside                        | BC           | 7.75     | 465                      | 303 | -   | -   |
|             |                                                           | Bil          | 7.90     |                          |     |     |     |
| 4           | delphinidin-3- <i>O</i> -rutinoside                       | BC           | 8.40     | 611                      | 465 | 303 | -   |
| 5           | cyanidin-3- <i>O</i> -galactoside                         | Bil          | 8.48     | 449                      | 287 | -   | -   |
| 6           | delphinidin-3- <i>O</i> -arabinoside                      | Bil          | 8.71     | 435                      | 303 |     |     |
| 7           | cyanidin-3- <i>O</i> -glucoside                           | BC           | 8.94     | 449                      | 287 | -   | -   |
|             |                                                           | BB           | 9.07     |                          |     |     |     |
|             |                                                           | Bil          | 9.12     |                          |     |     |     |
| 8           | cyanidin-3- <i>O</i> -sambubioside                        | EB           | 9.03     | 581                      | 449 | 287 | -   |
| 9           | petunidin-3- <i>O</i> -galactoside                        | Bil          | 9.50     | 479                      | 317 | -   | -   |
| 10          | cyanidin-3- <i>O</i> -rutinoside                          | BC           | 9.63     | 595                      | 287 | -   | -   |
|             |                                                           | BB           | 9.78     |                          |     |     |     |
| 11          | cyanidin-3- <i>O</i> -arabinoside                         | Bil          | 9.79     | 419                      | 287 | -   | -   |
| 12          | petunidin-3- <i>O</i> -glucoside                          | Bil          | 10.01    | 479                      | 317 | -   | -   |
| 13          | petunidin-3- <i>O</i> -rutinoside                         | BC           | 10.39    | 625                      | 317 | -   | -   |
| 14          | peonidin-3- <i>O</i> -galactoside                         | Bil          | 10.50    | 463                      | 301 | -   | -   |
| 15          | petunidin-3- <i>O</i> -arabinoside                        | Bil          | 10.73    | 449                      | 317 | -   | -   |
| 16          | peonidin-3- <i>O</i> -glucoside                           | Bil          | 11.05    | 463                      | 301 | -   | -   |
| 17          | malvidin-3- <i>O</i> -galactoside                         | Bil          | 11.17    | 493                      | 331 | -   | -   |
| 18          | peonidin-3- <i>O</i> -rutinoside                          | BC           | 11.44    | 609                      | 301 | -   | -   |
| 19          | malvidin-3- <i>O</i> -glucoside                           | Bil          | 11.62    | 493                      | 331 | -   | -   |
| 20          | cyanidin-3- <i>O</i> -xyloside                            | BB           | 11.87    | 519                      | 287 | -   | -   |
| 21          | cyanidin-3- <i>O</i> -(6"- <i>O</i> -malonyl)-glucoside   | BB           | 12.10    | 535                      | 287 | -   | -   |
| 22          | malvidin-3- <i>O</i> -arabinoside                         | Bil          | 12.34    | 463                      | 331 | -   | -   |
| 23          | cyanidin-3- <i>O</i> -(6"- <i>O</i> -dioxalyl)-glucoside  | BB           | 12.85    | 593                      | 287 | -   | -   |

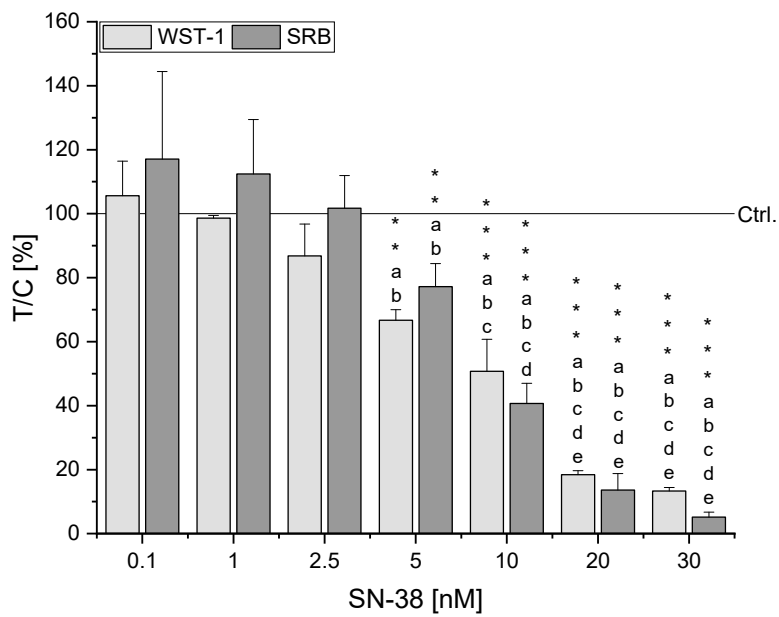

Figure S3: Cytotoxic properties of different concentrations of SN-38 assessed by the coupled WST-1 and SRB assay. CT26 cells were incubated for 72 h with SN-38. Data presented are the means + SD of at least three independent replicates measured in triplicates expressed as T/C in %. Statistical differences were calculated with one-way ANOVA via post hoc Bonferroni test ( $p < 0.05$ , a-f; e.g., the letter a represents significance compared to the lowest concentration of 0.1  $\mu\text{M}$ ). Significances to the solvent control were calculated with one sample Student's *t*-tests (\*\*  $p < 0.01$ , \*\*\*  $p < 0.001$ ).

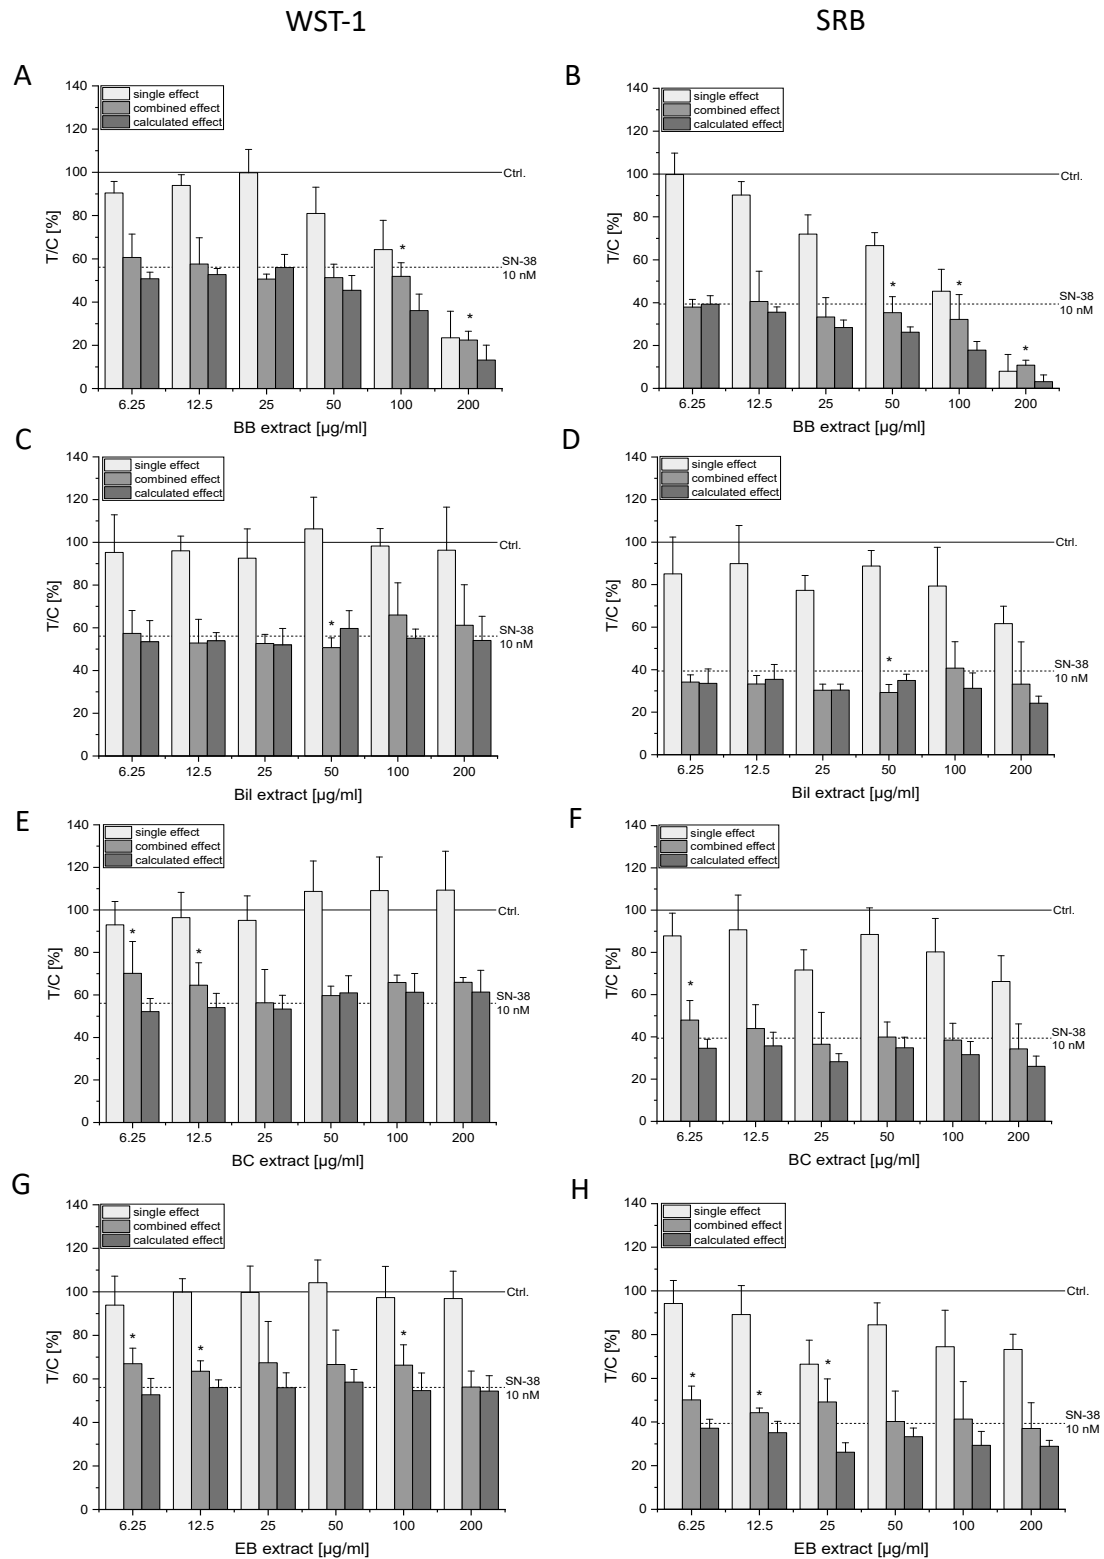

Figure S4: Independent joint action calculation from cytotoxic effects of blackberry (BB; **A, B**), bilberry (Bil; **B, C**), black currant (BC; **E, F**) and elderberry (EB; **G, H**) extracts and SN-38 (10 nM, dashed line) assessed with the WST-1 (**left**) and SRB (**right**) assay. CT26 cells were incubated for 72 hours with the respective substance. Results presented are the means + SD of the single extract effects (light grey bars), SN-38 single effect (dashed line,  $y=56.1$  % for WST-1,  $y=39.4$  % for SRB) and measured combined effects (middle grey bars) of at least three independent biological replicates measured in technical triplicates relative to the solvent control (Ctrl., 0.6 % DMSO, straight line,  $y=100$  %). Dark grey bars represent the calculated combined effects of extracts and SN-38. Statistical differences between measured and calculated combined effect were evaluated with two sample Student's *t*-tests (\*  $p<0.05$ ).

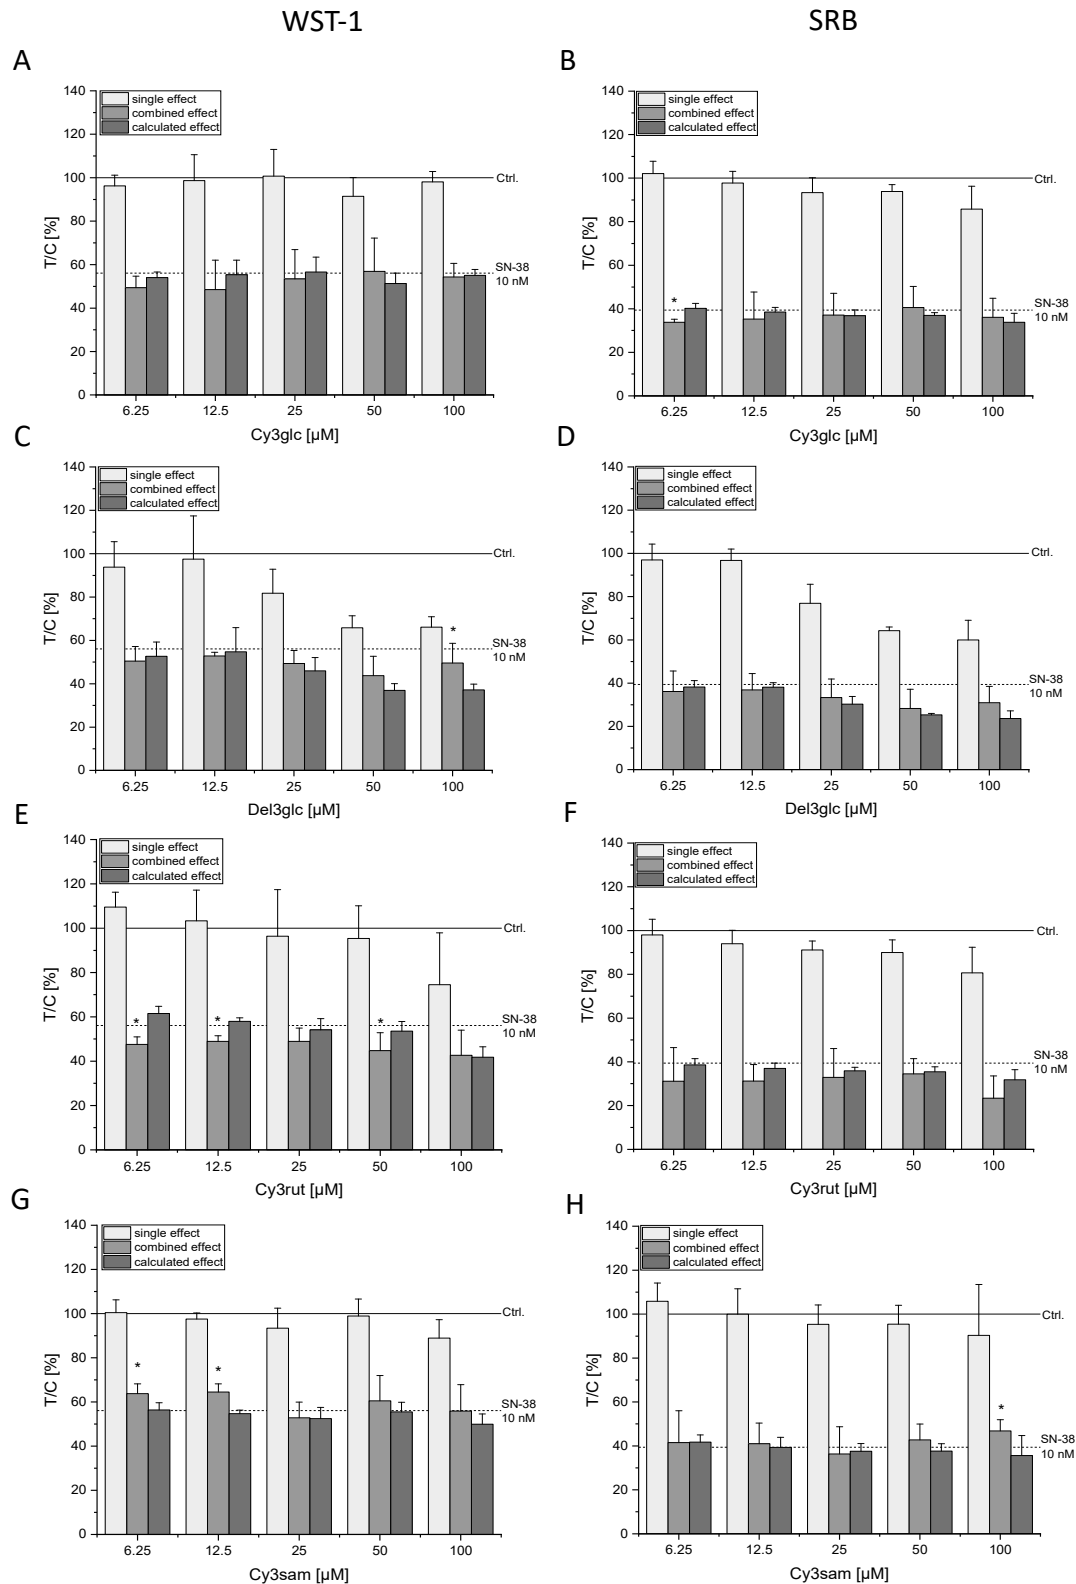

Figure S5: Independent joint action calculation from cytotoxic effects of Cy3glc (**A**, **B**), Del3glc (**B**, **C**), Cy3rut (**E**, **F**) and Cy3sam (**G**, **H**) and SN-38 (10 nM, dashed line) assessed with the WST-1 (**left**) and SRB (**right**) assay. CT26 cells were incubated for 72 hours with the respective substance. Results presented are the means + SD of the single anthocyanin effects (light grey bars), SN-38 single effect (dashed line,  $y=56.1\%$  for WST-1,  $y=39.4\%$  for SRB) and measured combined effects (middle grey bars) of at least three independent biological replicates measured in technical triplicates relative to the solvent control (0.6 % DMSO, straight line,  $y=100\%$ ). Dark grey bars represent the calculated combined effects of anthocyanins and SN-38. Statistical differences between measured and calculated combined effect were evaluated with two sample Student's  $t$ -tests (\*  $p<0.05$ ).

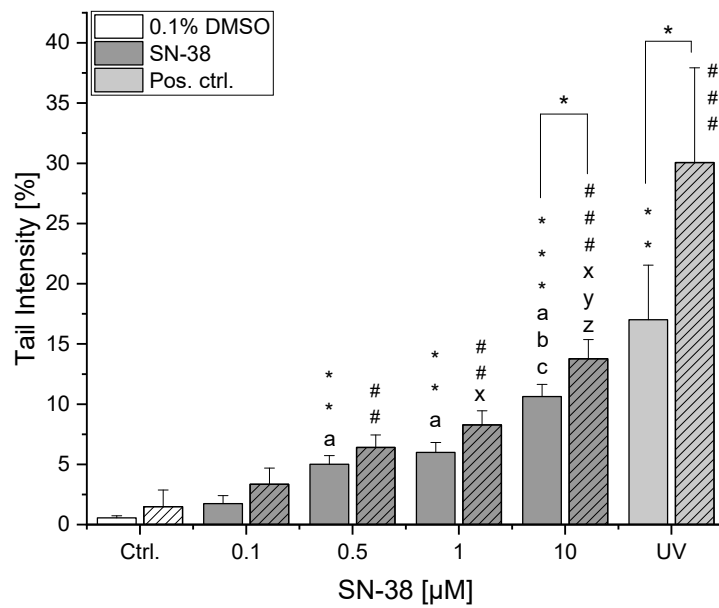

Figure S6: DNA-damaging properties of different concentrations of SN-38 assessed by the comet assay. CT26 cells were incubated for 1 h with SN38 and 1 min UV-B irradiation served as positive control. Striped bars indicate samples additionally treated with FPG enzyme. Data presented are the means + SD of at least three independent replicates expressed as tail intensity in %. Statistical differences among the tested concentrations were calculated with one-way ANOVA via post hoc Bonferroni test ( $p < 0.05$ , a-c without FPG, x-z with FPG). Significances to the respective solvent control were calculated with two sample Student's *t*-tests (\*\* or ##  $p < 0.01$ , \*\*\* or ###  $p < 0.001$ , \* without FPG, # with FPG).
